# Supplementary material
Source: HighWire-hosted journal article supplement (https://jnm.snmjournals.org/highwire/filestream/111909/field_highwire_adjunct_files/0/265252_Supplemental_Data.pdf)
Supplement: 265252_Supplemental_Data.pdf [file 265252_Supplemental_Data.pdf]

Supplemental Table 1: Patients' characteristics (n=222).

| Parameter                                | Early SPECT<br>(≤4h p.i.; n = 44) | Late SPECT<br>(≥15h p.i.; n = 178) | p-value |
|------------------------------------------|-----------------------------------|------------------------------------|---------|
| Year of initial RP, Median (IQR)         | 2010 (2005, 2013)                 | 2014 (2010, 2016)                  | <0.001  |
| PSA at RP, ng/ml, Median (IQR)           | 10 (6, 16)                        | 9 (6, 15)                          | 0.8     |
| pT stage at RP, n (%)                    |                                   |                                    | 0.9     |
| pT2                                      | 13 (30)                           | 61 (34)                            |         |
| pT3a                                     | 16 (36)                           | 60 (34)                            |         |
| pT3b                                     | 14 (32)                           | 55 (31)                            |         |
| NA                                       | 1 (2.3)                           | 2 (1.1)                            |         |
| Gleason grade group, n (%)               |                                   |                                    | 0.08    |
| I                                        | 6 (14)                            | 12 (6.7)                           |         |
| II                                       | 8 (18)                            | 51 (29)                            |         |
| III                                      | 11 (25)                           | 65 (37)                            |         |
| IV                                       | 5 (11)                            | 12 (6.7)                           |         |
| V                                        | 11 (25)                           | 35 (20)                            |         |
| NA                                       | 3 (6.8)                           | 3 (1.7)                            |         |
| pN stage at RP, n (%)                    |                                   |                                    | 0.9     |
| pN0                                      | 34 (77)                           | 131 (74)                           |         |
| pN1                                      | 8 (18)                            | 36 (20)                            |         |
| pNX/NA                                   | 2 (4.5)                           | 11 (6.2)                           |         |
| Lymph node yield at RP, Median (IQR)     | 13 (8, 20)                        | 13 (8, 20)                         | 0.6     |
| No. of positive lymph nodes at RP, n (%) |                                   |                                    | 0.6     |

|                                         |                |                |                  |
|-----------------------------------------|----------------|----------------|------------------|
| 0                                       | 32 (73)        | 115 (65)       |                  |
| 1                                       | 3 (6.8)        | 19 (11)        |                  |
| 2                                       | 3 (6.8)        | 9 (5.1)        |                  |
| >=3                                     | 2 (4.5)        | 5 (2.8)        |                  |
| Unknown                                 | 4 (9.1)        | 30 (17)        |                  |
| Surgical margin status, n (%)           |                |                | 0.05             |
| R0                                      | 29 (66)        | 130 (73)       |                  |
| R1                                      | 9 (20)         | 41 (23)        |                  |
| RX/NA                                   | 6 (14)         | 7 (3.9)        |                  |
| RT post RP, n (%)                       |                |                | 0.1              |
| No RT                                   | 15 (34)        | 59 (33)        |                  |
| RT post RP                              | 28 (64)        | 119 (67)       |                  |
| NA                                      | 1 (2.3)        | 0 (0)          |                  |
| Time RP to SPECT, months, Median (IQR)  | 70 (22, 128)   | 46 (22, 88)    | 0.2              |
| Age at PSMA-RGS, years, Median (IQR)    | 72 (65, 75)    | 66 (61, 70)    | <b>&lt;0.001</b> |
| PSA prior to SPECT, ng/ml, Median (IQR) | 1.4 (0.7, 3.0) | 1.0 (0.5, 2.0) | 0.09             |

Abbreviations: PSA = prostate specific antigen, NA = not assigned, RP = radical prostatectomy, RT = radiotherapy, IQR = interquartile range.

Supplemental Table 2: Imaging and technical parameters of used SPECT/CT scanners.

|               |                               | <b>Mediso<br/>AnyScan® Trio</b>      | <b>Siemens<br/>Symbia Intevo Bold™</b> | <b>Siemens<br/>Symbia T9™</b>          |
|---------------|-------------------------------|--------------------------------------|----------------------------------------|----------------------------------------|
| <b>Planar</b> | Scan speed                    | 120 mm/min                           | 120 mm/min                             |                                        |
| <b>SPECT</b>  | Number of projections         | 96                                   | 128                                    | 120                                    |
|               | Time per projection           | 40                                   | 20                                     | 10                                     |
|               | Collimator                    | LEHRHS                               | LEHR                                   | LHER                                   |
|               | Reconstruction                | Tera-Tomo Q 3D                       | Flash 3D                               | Flash 3D                               |
|               | Reconstruction parameters     | 105 iterations,<br>5 subsets         | 12 (sub)iterations,<br>2 subsets       | 12 (sub)iterations,<br>2 subsets       |
|               |                               | CT-based attenuation correction      | CT-based attenuation correction        | CT-based attenuation correction        |
|               |                               | Monte Carlo based scatter correction | Energy window based scatter correction | Energy window based scatter correction |
|               | Matrix                        | 128 x 128                            | 128 x 128                              | 128 x 128                              |
|               | Voxel size                    | 4.26 mm                              | 4.80 mm                                | 4.80 mm                                |
| <b>CT</b>     | Tube voltage                  | 100 - 130 kV                         | 100 - 130 kV                           | 100 – 130 kV                           |
|               | Tube current                  | Automatic                            | Automatic                              | Automatic                              |
|               | Slice thickness               | 0.6 mm                               | 0.6 mm                                 | 0.8                                    |
|               | Slice thickness reconstructed | 3 mm                                 | 3 mm                                   | 3 mm                                   |

Supplemental Table 3: Visual four point scale used to rate [<sup>99m</sup>Tc]Tc-PSMA-I&S SPECT/CT detected lesions divided into SPECT-negative (score 1 and 2) and SPECT positive (score 3 and 4). Non-demarcable lesions were given a score of 1 and lesions that were only detectable with knowledge of PET were given a score of 2. Score 3 was assigned to lesions with moderate uptake and score 4 to lesions with intense uptake. In qualitative assessment, lesions with score 3 and 4 were considered positive

| <b>Score</b> | <b>Description</b>                                              | <b>Evaluation</b> |
|--------------|-----------------------------------------------------------------|-------------------|
| 1            | not visible                                                     | negative          |
| 2            | slight tracer uptake<br>(only recognizable in knowledge of PET) | negative          |
| 3            | moderate tracer uptake                                          | positive          |
| 4            | intensive tracer uptake                                         | positive          |
